# Supplementary material for: Band gap modulation of organic–inorganic Sb(iii) halide by molecular design
Source: Royal Society of Chemistry journal article supplement (doi:10.1039/d1ce01615f), 2022-01-01
Supplement: d1ce01615f1.pdf [file d1ce01615f1.pdf]

# **Band gap modulation of organic-inorganic Sb(III) halide by molecular design**

*Yan-Ning Wang, Liang Tong, Min-Wan, Jing-Yuan Liu, Si-Yu Ye, Abraham Mensah, Jun-Yi Li\*, Li-Zhuang Chen\**

School of Environmental and Chemical Engineering, Jiangsu University of Science and Technology,  
Zhenjiang 212003, People's Republic of China.

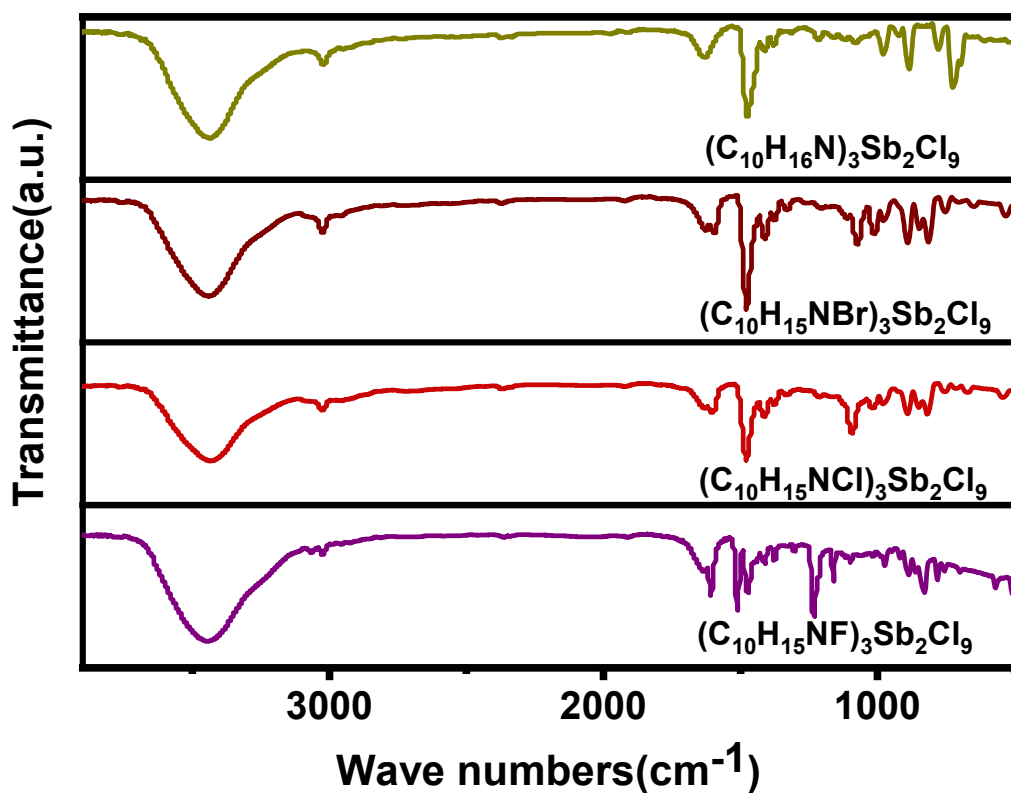

Fig. S1. Infrared spectrum of compound 1-4.

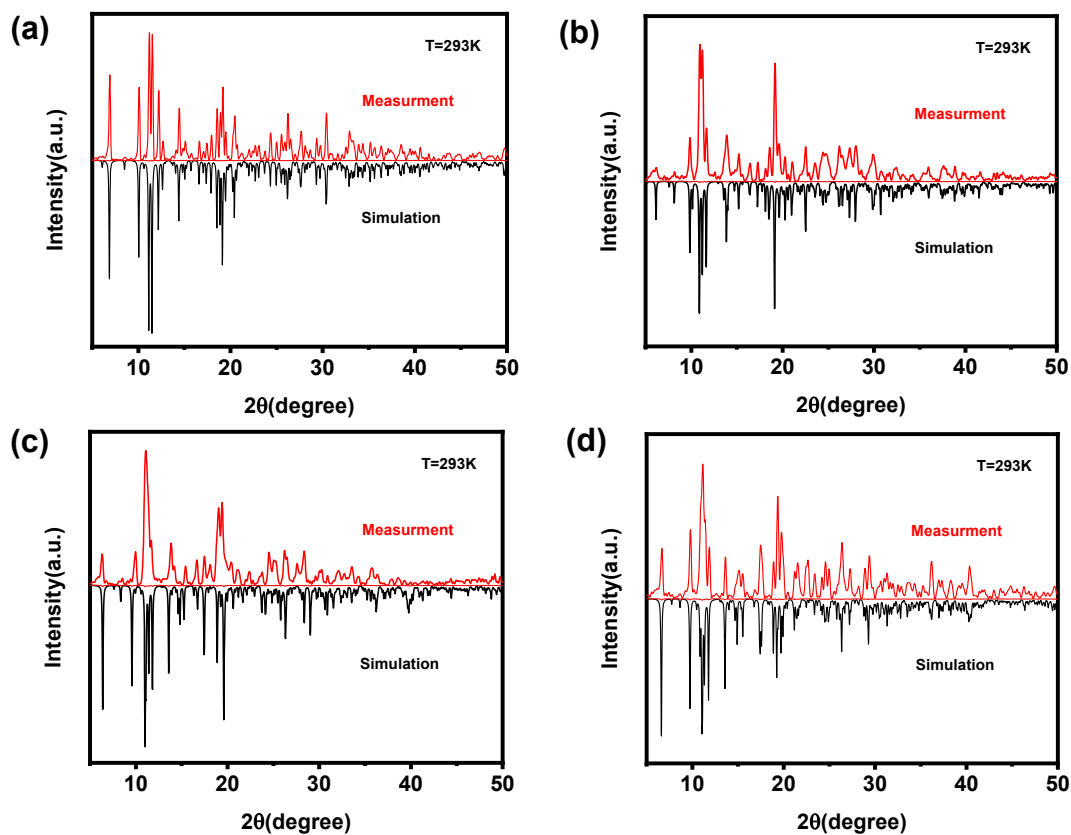

Fig. S2. Powder X-ray diffraction (PXRD) of compound 1 (a), 2 (b), 3 (c) and 4 (d).

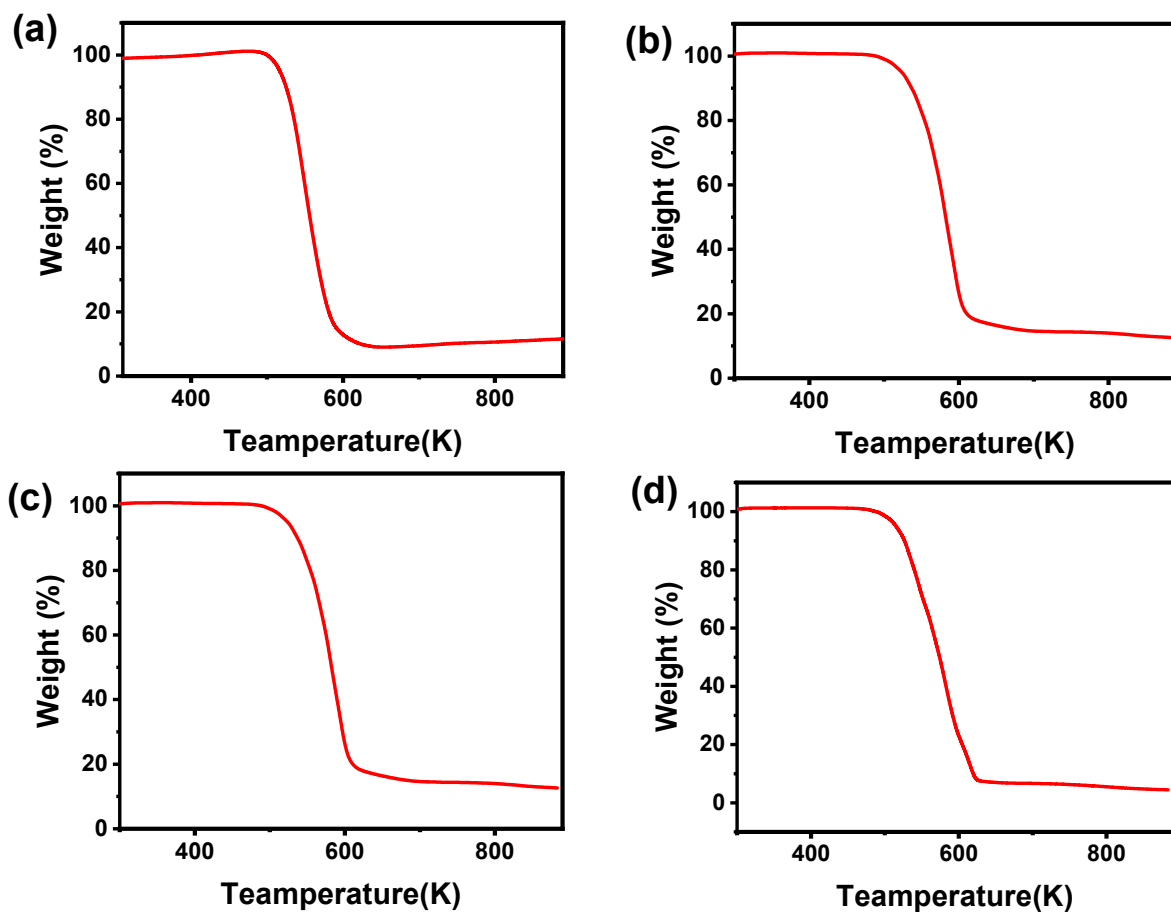

**Fig. S3** The TG curves for 1-4 (a-d), indicating that the four compounds are stable at least up to 500K.

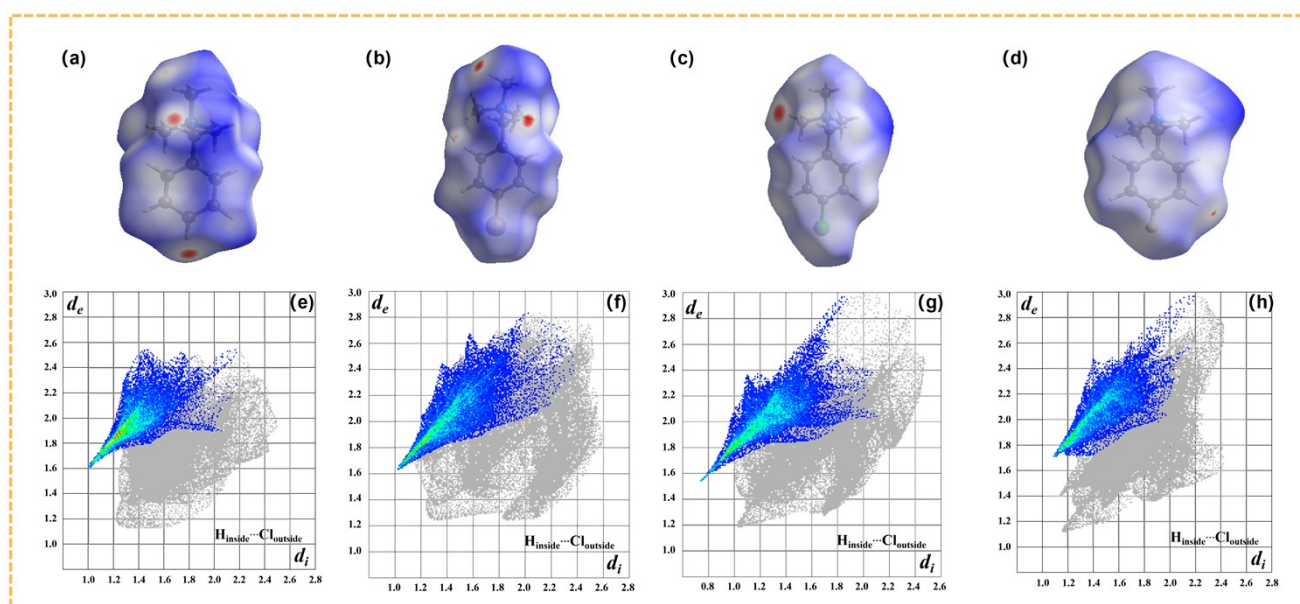

**Fig. S4** The Hirshfeld dnorm surface of 1-4 (a-d) and 2D fingerprint plot of 1-4 (e-h).

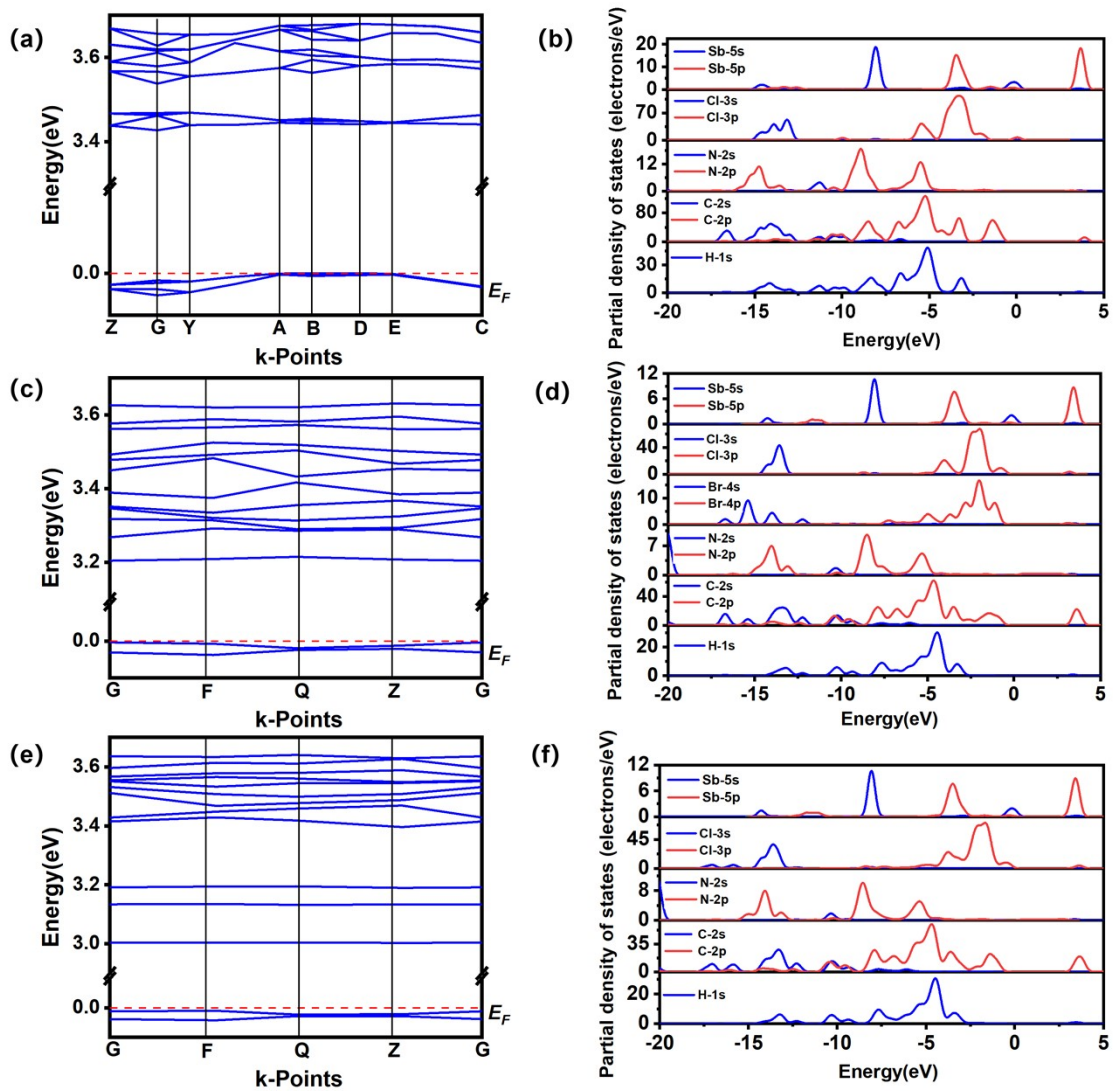

**Fig. S5.** Calculated band structure of compound **1** (a), **2** (c), **3** (e) and Partial density of states (PDOS) of compound **1** (b), **2** (d), **3** (f).

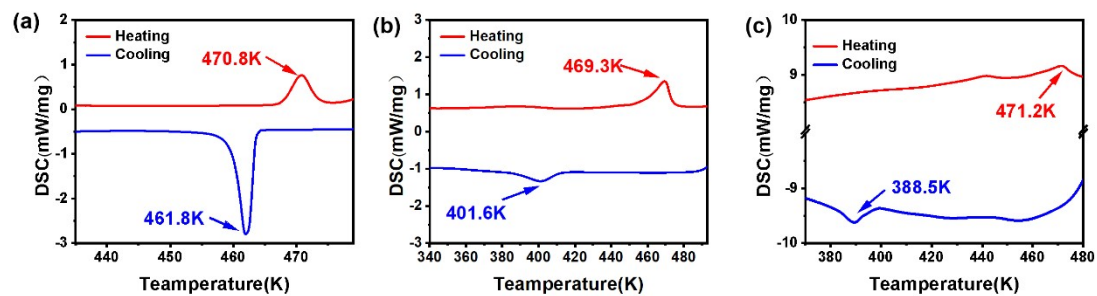

**Fig. S6.** DSC of compound **1** (a), **3** (b) and **4** (c).

**Table S1.** Crystal data of compound **1-4**.

|                                                | (C <sub>10</sub> H <sub>16</sub> N) <sub>3</sub> Sb <sub>2</sub> Cl <sub>9</sub> | (C <sub>10</sub> H <sub>15</sub> NBr) <sub>3</sub> Sb <sub>2</sub> Cl <sub>9</sub>             | (C <sub>10</sub> H <sub>15</sub> NCl) <sub>3</sub> Sb <sub>2</sub> Cl <sub>9</sub> | (C <sub>10</sub> H <sub>15</sub> NF) <sub>3</sub> Sb <sub>2</sub> Cl <sub>9</sub>             |
|------------------------------------------------|----------------------------------------------------------------------------------|------------------------------------------------------------------------------------------------|------------------------------------------------------------------------------------|-----------------------------------------------------------------------------------------------|
| T (K)                                          | 293                                                                              | 293                                                                                            | 293                                                                                | 293                                                                                           |
| Empirical formula                              | C <sub>30</sub> H <sub>48</sub> Cl <sub>9</sub> N <sub>3</sub> Sb <sub>2</sub>   | C <sub>30</sub> H <sub>45</sub> Br <sub>3</sub> Cl <sub>9</sub> N <sub>3</sub> Sb <sub>2</sub> | C <sub>30</sub> H <sub>45</sub> Cl <sub>12</sub> N <sub>3</sub> Sb <sub>2</sub>    | C <sub>30</sub> H <sub>45</sub> Cl <sub>9</sub> F <sub>3</sub> N <sub>3</sub> Sb <sub>2</sub> |
| Formula weight                                 | 1013.26                                                                          | 1249.97                                                                                        | 1116.59                                                                            | 1067.24                                                                                       |
| Crystal system                                 | monoclinic                                                                       | triclinic                                                                                      | triclinic                                                                          | triclinic                                                                                     |
| Space group                                    | <i>P</i> 2 <sub>1</sub> / <i>c</i>                                               | <i>P</i> -1                                                                                    | <i>P</i> -1                                                                        | <i>P</i> -1                                                                                   |
| a (Å)                                          | 9.2809(9)                                                                        | 9.3055(3)                                                                                      | 9.1074(10)                                                                         | 9.275(2)                                                                                      |
| b (Å)                                          | 25.774(3)                                                                        | 14.9937(6)                                                                                     | 14.2404(16)                                                                        | 13.826(3)                                                                                     |
| c (Å)                                          | 17.6172(18)                                                                      | 18.0441(7)                                                                                     | 18.540(2)                                                                          | 18.274(4)                                                                                     |
| α (°)                                          | 90.00                                                                            | 84.989(3)                                                                                      | 84.512(9)                                                                          | 83.423(5)                                                                                     |
| β (°)                                          | 92.2610(10)                                                                      | 86.538(3)                                                                                      | 89.419(9)                                                                          | 89.796(6)                                                                                     |
| γ (°)                                          | 90.00                                                                            | 74.258(2)                                                                                      | 77.186(8)                                                                          | 76.621(5)                                                                                     |
| Volume (Å <sup>3</sup> )                       | 4210.8(7)                                                                        | 2412.13(16)                                                                                    | 2333.8(5)                                                                          | 2264.1(9)                                                                                     |
| Z                                              | 4                                                                                | 2                                                                                              | 2                                                                                  | 2                                                                                             |
| D <sub>c</sub> (g/cm <sup>-3</sup> )           | 1.598                                                                            | 1.721                                                                                          | 1.589                                                                              | 1.565                                                                                         |
| M (mm <sup>-1</sup> )                          | 1.879                                                                            | 4.127                                                                                          | 1.869                                                                              | 1.760                                                                                         |
| F (000)                                        | 2016.0                                                                           | 1212.0                                                                                         | 1104.0                                                                             | 1056.0                                                                                        |
| 2θ range [°]                                   | 2.8 to 52                                                                        | 5.024 to 50.054                                                                                | 5.98 to 51.36                                                                      | 2.24 to 52.74                                                                                 |
| Collected reflections                          | 27639                                                                            | 29777                                                                                          | 15117                                                                              | 16879                                                                                         |
| Unique reflections                             | 8251                                                                             | 8475                                                                                           | 8736                                                                               | 9192                                                                                          |
| R <sub>1</sub> , wR <sub>2</sub> [I >= 2σ (I)] | 0.0485, 0.1448                                                                   | 0.1008, 0.3214                                                                                 | 0.0995, 0.2704                                                                     | 0.0898, 0.2772                                                                                |
| R <sub>1</sub> , wR <sub>2</sub> [all data]    | 0.0576, 0.1524                                                                   | 0.1368, 0.3504                                                                                 | 0.1601, 0.3082                                                                     | 0.1152, 0.3029                                                                                |
| GOF                                            | 1.065                                                                            | 1.334                                                                                          | 1.039                                                                              | 1.058                                                                                         |
| Largest peak and hole (e/Å <sup>3</sup> )      | 2.01 and -0.90                                                                   | 8.03 and -1.11                                                                                 | 2.70 and -1.89                                                                     | 3.54 and -1.34                                                                                |

**Table S2.** Hydrogen bonds at 293 K for **1**.

| D—H...A          | D—H       | H...A   | D...A     | <DHA    |
|------------------|-----------|---------|-----------|---------|
| C2AA—H2AA...Cl10 | 0.97(7)   | 2.79(2) | 3.646(7)  | 148(5)  |
| C0AA—H0AA...Cl7  | 0.93(10)  | 2.78(2) | 3.658(10) | 157(6)  |
| C8—H8...Cl2      | 0.93(10)  | 2.75(2) | 3.572(10) | 148(7)  |
| C11—H11A...Cl10  | 0.96(9)   | 2.78(2) | 3.598(9)  | 144(5)  |
| C9AA—H9AB...Cl10 | 0.961(17) | 2.83(2) | 3.296(17) | 111(10) |
| C19—H19A...Cl7   | 0.970(7)  | 2.79(2) | 3.728(8)  | 163(5)  |

**Table S3.** Hydrogen bonds at 293 K for **2**.

| D—H...A          | D—H       | H...A    | D...A     | <DHA    |
|------------------|-----------|----------|-----------|---------|
| C0AA—H0AA...Cl20 | 0.98(3)   | 2.80(4)  | 3.64(3)   | 144(14) |
| C17—H17A...Cl10  | 0.989(16) | 2.76(6)  | 3.584(17) | 142(10) |
| C20—H20B...Cl8   | 0.980(17) | 2.82(6)  | 3.538(19) | 130(13) |
| C21—H21B...Cl9   | 0.98(2)   | 2.80(5)  | 3.48(2)   | 127(11) |
| C21—H21C...Cl10  | 0.978(18) | 2.633(4) | 3.57(2)   | 160(14) |
| C24—H24A...Cl10  | 0.98(3)   | 2.78(6)  | 3.72(3)   | 162(13) |
| C25—H25B...Cl11  | 0.98(3)   | 2.82(5)  | 3.76(3)   | 160(15) |

**Table S4.** Hydrogen bonds at 293 K for **3**.

| D—H...A         | D—H      | H...A   | D...A     | <DHA    |
|-----------------|----------|---------|-----------|---------|
| C23—H23A...Cl10 | 0.96(18) | 2.79(5) | 3.719(18) | 162(9)  |
| C81—H81A...Cl6  | 0.96(3)  | 2.74(5) | 3.47(3)   | 133(13) |
| C81—H81B...Cl11 | 0.96(2)  | 2.61(4) | 3.54(3)   | 163(16) |

**Table S5.** Hydrogen bonds at 293 K for **4**.

| D—H...A         | D—H       | H...A   | D...A     | <DHA   |
|-----------------|-----------|---------|-----------|--------|
| C27—H27B...Cl10 | 0.961(16) | 2.81(4) | 3.762(16) | 172(9) |

**Table S6.** Selected bond angles [°] for compound **1** at 293 K

|              |           |             |          |
|--------------|-----------|-------------|----------|
| Cl2-Sb1-Cl5  | 86.41(7)  | C3-N1-C11   | 108.6(6) |
| Cl2-Sb1-Cl6  | 89.00(7)  | C9-N1-C2AA  | 111.0(6) |
| Cl2-Sb1-Cl10 | 92.10(7)  | C11-N1-C2AA | 108.9(6) |
| Cl6-Sb1-Cl5  | 175.31(6) | C11-N1-C9   | 107.8(6) |
| Cl10-Sb1-Cl5 | 91.18(6)  | C4-C2AA-N1  | 115.1(5) |
| Cl10-Sb1-Cl6 | 89.93(6)  | C7-C4-C2AA  | 120.8(7) |
| Cl17-Sb2-Cl3 | 175.02(5) | C10-C4-C2AA | 120.3(7) |
| Cl8-Sb2-Cl3  | 88.74(5)  | C10-C4-C7   | 118.8(8) |
| Cl8-Sb2-Cl7  | 93.07(6)  | C8-C9AA-C7  | 120.2(9) |
| Cl8-Sb2-Cl9  | 89.23(6)  | C10-C6-C8   | 120.0(9) |

|              |           |                |           |
|--------------|-----------|----------------|-----------|
| C19-Sb2-C13  | 95.24(6)  | C8AA-C7-C4     | 120.4(8)  |
| C19-Sb2-C17  | 89.43(6)  | C8AA -C8-C6    | 119.7(9)  |
| C14-N0AA-C19 | 110.8(6)  | C4-C10-C6      | 120.9(9)  |
| C15-N0AA-C14 | 108.3(6)  | C3AA-N2-C5     | 110.6(10) |
| C15-N0AA-C19 | 111.6(5)  | C3AA-N2-C7AA   | 104.2(10) |
| C15-N0AA-C22 | 108.7(6)  | C3AA-N2-C9AA   | 104.6(11) |
| C22-N0AA-C14 | 109.4(6)  | C5-N2-C7AA     | 112.1(11) |
| C22-N0AA-C19 | 107.9(6)  | C5-N2-C9AA     | 111.8(9)  |
| C17-C13-C18  | 118.3(8)  | C9AA-N2-C7AA   | 112.9(12) |
| C17-C13-C19  | 122.0(7)  | C0AA-C1-C1AA   | 117.1(9)  |
| C18-C13-C19  | 119.7(7)  | C0AA-C1-C5     | 124.3(10) |
| C20-C16-C21  | 120.5(10) | C1AA-C1-C5     | 118.6(10) |
| C13-C17-C20  | 120.7(9)  | C6AA-C0AA-C1   | 121.6(10) |
| C21-C18-C13  | 121.1(9)  | C4AA-C1AA-C1   | 119.6(9)  |
| C13-C19-N0AA | 114.7(5)  | N2-C5-C1       | 116.9(8)  |
| C16-C20-C17  | 119.3(10) | C6AA-C5AA-C4AA | 121.1(11) |
| C18-C21-C16  | 120.2(10) | C5AA-C6AA-C0AA | 121.1(10) |
| C3-N1-C2AA   | 111.3(6)  | C5AA-C4AA-C1AA | 119.3(10) |
| C3-N1-C9     | 109.2(6)  |                |           |

**Table S7.** Selected bond angles [ $^{\circ}$ ] for compound **2** at 293 K

|              |            |             |           |
|--------------|------------|-------------|-----------|
| C11-Sb1 -C18 | 90.85(12)  | C3-N12-C14  | 109.3(10) |
| C11-Sb1 -C12 | 92.22(17)  | C3-N12-C1   | 110.7(12) |
| C11-Sb1-C112 | 88.65(15)  | C3-N12-C2   | 108.6(12) |
| C12-Sb1 -C18 | 93.65(14)  | C15-C14-N12 | 118.5(11) |
| C12-Sb1-C112 | 89.32(17)  | C18-C15-C14 | 122.3(16) |
| C112-Sb1-C18 | 177.01(15) | C18-C15-C19 | 115.7(17) |

|               |            |              |           |
|---------------|------------|--------------|-----------|
| Cl9-Sb2 -Cl3  | 88.51(12)  | C19-C15-C14  | 121.9(15) |
| Cl9-Sb2 -Cl10 | 88.83(14)  | C15-C18-6    | 121.1(18) |
| Cl10-Sb2-Cl3  | 177.02(13) | C5-C4-C19    | 117(2)    |
| Cl11-Sb2-Cl3  | 88.44(12)  | C15-C19-C4   | 124.2(18) |
| Cl11-Sb2-Cl9  | 94.58(17)  | C4-C5-Br4    | 118.7(15) |
| Cl11-Sb2-Cl10 | 90.43(15)  | C6-C5-C4     | 122.2(18) |
| C40 -C10-C56  | 116.7(15)  | C6-C5-Br4    | 119.0(15) |
| C40 -C10-C17  | 124.3(14)  | C5-C6-C18    | 119.7(18) |
| C56-C10-C17   | 119.1(14)  | C7-N1-C0AA   | 112.9(15) |
| C40 -C13-C30  | 123.6(18)  | C21-N1-C7    | 106.6(14) |
| C13-C30-Br6   | 122.4(13)  | C21-N1-C0AA  | 108.6(18) |
| C55-C30-Br6   | 118.0(13)  | C25-N1-C7    | 117.6(19) |
| C55-C30-C13   | 119.1(17)  | C25 -N1-C21  | 101.1(16) |
| C13 -C40-C10  | 122.2(15)  | C25 -N1-C0AA | 109.1(18) |
| C30-C55-C56   | 116.8(16)  | C8-C7-N1     | 115.1(14) |
| C10-C56-C55   | 121.2(15)  | C7-C8-C9     | 125.5(19) |
| C20 -N14-C17  | 112.8(12)  | C16-C8-C7    | 121(2)    |
| C20-N14-C24   | 107.3(18)  | C16-C8-C9    | 113(2)    |
| C23-N14-C17   | 109.1(14)  | C11-C9-C8    | 130(2)    |
| C23-N14-C20   | 108.4(15)  | C8-C16-C22   | 123(2)    |
| C23-N14-C24   | 111.0(17)  | C9-C11-C12   | 114(2)    |
| C24-N14-C17   | 108.2(14)  | C11-C12-Br7  | 120.7(18) |
| C10-C17-N14   | 114.5(12)  | C11-C12-C22  | 124(2)    |
| C14 -N12-C1   | 109.1(12)  | C22-C12-Br7  | 114.9(17) |
| C2-N12-C14    | 112.5(12)  | C16 -C22-C12 | 116(2)    |
| C2-N12-C1     | 106.6(13)  |              |           |

**Table S8.** Selected bond angles [ $^{\circ}$ ] for compound **3** at 293 K



|               |            |               |           |
|---------------|------------|---------------|-----------|
| CI5-Sb1 -CI10 | 178.94(14) | C41-C20-C18   | 117.4(15) |
| CI7-Sb1-CI5   | 90.07(13)  | C41-C24-C30   | 119.8(16) |
| CI7-Sb1-CI10  | 89.01(15)  | C38-C29-54    | 120.6(19) |
| CI8-Sb1-CI5   | 90.68(14)  | C24 -C30-CI1  | 120.3(15) |
| CI8-Sb1-CI7   | 93.27(16)  | C46 -C30-CI1  | 120.1(18) |
| CI8-Sb1-CI10  | 88.84(14)  | C46-C30-C24   | 119.4(16) |
| CI6-Sb2-CI3   | 87.68(13)  | C29-C38-CI2   | 119.9(13) |
| CI6-Sb2-CI11  | 89.56(14)  | C29-C38-C42   | 118.3(16) |
| CI9-Sb2 -CI3  | 90.50(14)  | C42 -C38-CI2  | 120.4(13) |
| CI9-Sb2 -CI6  | 95.69(15)  | C24-C41-C20   | 118.7(16) |
| CI9-Sb2-CI11  | 92.02(16)  | C38-C42-C15   | 121.0(16) |
| CI11-Sb2-CI3  | 176.44(13) | C12 -C46-C30  | 119.9(19) |
| C18-N7-C17    | 108.8(11)  | C29-C54-C19   | 120.9(19) |
| C18-N7-C23    | 109.8(11)  | N11-C70-C19   | 113.6(14) |
| C18 -N7-C34   | 112.7(11)  | C26-C8-C44    | 120(2)    |
| C23-N7-C17    | 107.5(11)  | C50-N14-C67   | 111.0(19) |
| C23 -N7-C34   | 107.9(13)  | C50-N14-C81   | 107.4(17) |
| C34 -N7-C17   | 110.1(12)  | C67-N14-C81   | 105.3(19) |
| C31 -N11-C32  | 106.8(15)  | C76-N14-C50   | 115.4(17) |
| C31-N11-C70   | 109.5(14)  | C76 -N14-C67  | 107.6(18) |
| C31-N11-C7    | 107.5(16)  | C76-N14-C81   | 109.7(17) |
| C70 -N11-C32  | 113.1(13)  | C8-C26-C76    | 124(2)    |
| C7-N11-C32    | 110.3(15)  | C8-C26-C4     | 112(2)    |
| C7-N11-C70    | 109.5(14)  | C4-C26-C76    | 123(2)    |
| C20-C12-C46   | 121.5(17)  | C44-C35-CI12  | 123(2)    |
| C19 -C15-C42  | 117.8(16)  | C44-C35-C52   | 121(3)    |
| N7-C18-C20    | 116.3(12)  | C52 -C35-CI12 | 116(2)    |

|              |           |             |           |
|--------------|-----------|-------------|-----------|
| C15 -C19-C54 | 120.5(17) | C35-C44-C8  | 123(3)    |
| C15-C19-C70  | 116.8(16) | C4-C52-C35  | 115(2)    |
| C54-C19-C70  | 122.3(16) | N14-C76-C26 | 113.9(18) |
| C12-C20-C18  | 122.0(15) | C52-C4-C26  | 127(2)    |
| C12-C20-C41  | 120.4(14) |             |           |

**Table S9.** Selected bond angles [°] for compound **4** at 293 K

|              |           |              |           |
|--------------|-----------|--------------|-----------|
| C19-Sb2-C18  | 91.22(12) | C13-C31-C79  | 120.1(15) |
| C19-Sb2-C11  | 96.01(14) | C47-C44-C12  | 120.5(16) |
| C11-Sb2-C18  | 92.02(13) | C44-C47-F21  | 119.6(18) |
| C41--N17-C43 | 106.1(15) | C44-C47--C79 | 120.8(15) |
| C41-N17-C19  | 106.4(16) | C47-C79-C31  | 119.0(16) |
| C43-N17-C77  | 111.3(15) | C26-N5-C10   | 109.3(10) |
| C19-N17-C43  | 113.0(17) | C49-N5-C10   | 110.0(12) |
| C19-N17-C77  | 112.0(16) | C49-N5-C26   | 110.7(13) |
| F53-C38-C64  | 119(3)    | C1-N5-C10    | 107.8(11) |
| C2-C38-F53   | 118(3)    | C1-N5-C26    | 106.6(13) |
| C2-C38-C64   | 123(3)    | C1-N5-C49    | 112.3(12) |
| C73-C48-C64  | 125(2)    | C20-C9-C10   | 121.3(13) |
| C73-C54-C2   | 124(2)    | C28-C9-C10   | 120.4(13) |
| C38-C64-C48  | 114(3)    | C28-C9-C20   | 118.3(14) |
| C48-C73-C54  | 115(2)    | C9-C10-N5    | 114.9(11) |
| C48-C73-C77  | 124(2)    | C36-C20-C9   | 121.9(14) |
| C54-C73-C77  | 120(2)    | C9-C28-C30   | 120.8(14) |
| C73-C77-N17  | 116.8(16) | C63-C30-C28  | 118.6(15) |
| C15-N4-C11   | 108.9(10) | C20-C36-C63  | 119.5(15) |

|            |           |             |           |
|------------|-----------|-------------|-----------|
| C27-N4-C11 | 109.9(11) | F14-C63-C36 | 119.9(15) |
| C27-N4-C15 | 111.8(10) | C30-C63-F14 | 119.5(16) |
| C33-N4-C11 | 109.5(11) | C30-C63-C36 | 120.5(16) |
| C33-N4-C15 | 110.7(10) | C38-C2-C54  | 118(3)    |
